# Supplementary material for: The PR/SET Domain Zinc Finger Protein Prdm4 Regulates Gene Expression in Embryonic Stem Cells but Plays a Nonessential Role in the Developing Mouse Embryo
Source: PubMed Central journal article supplement (PMC3811882; doi:10.1128/mcb.00498-13), 2013-10
Supplement: MCB.00498-13_zmb999100141so1.pdf [file MCB.00498-13_zmb999100141so1.pdf]

**A**

Motif 1  
2.4e-860  
402 sites

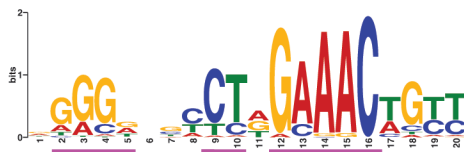

Motif 2  
1.4e-716  
194 sites

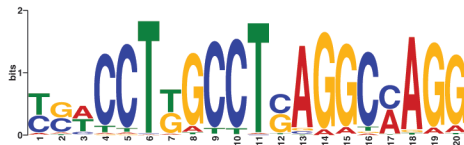

Motif 3  
1.2e-553  
420 sites

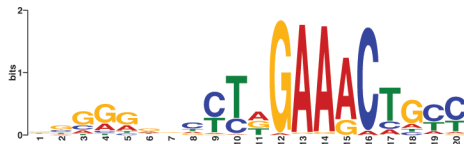

Motif 4  
1.6e-386  
145 sites

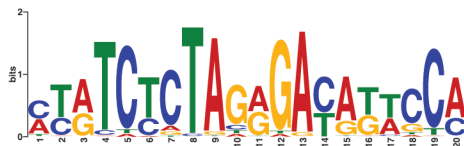

Motif 5  
8.2e-376  
112 sites

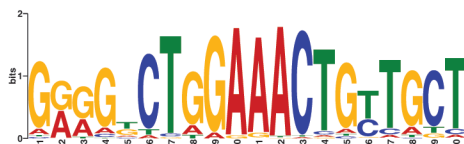**B**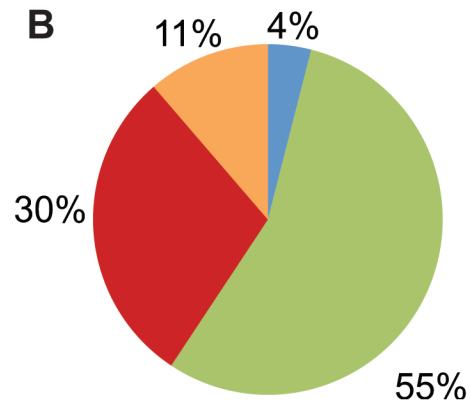

0 Prdm4 binding sites 1 Prdm4 binding sites

2 Prdm4 binding sites 3 Prdm4 binding sites

**FIG S1** Sequence motifs enriched in Prdm4 ChIP-seq peaks and their frequency. (A) Five 20mer sequences were identified within Prdm4 ChIP-seq peaks using MEME. *E* value and number of occurrences of each motif are shown. Motifs 1,3 and 5 are variants of the validated Prdm4-ZFD binding element. Motifs 2 and 4 are unidentified palindromes. The individual components of the Prdm4 tripartite motifs are underlined in pink. (B) Pie chart indicating number of significant matches ( $P \leq 6.5 \times 10^{-4}$ ) to motif 1, 3 or 5 per ChIP-seq peak.

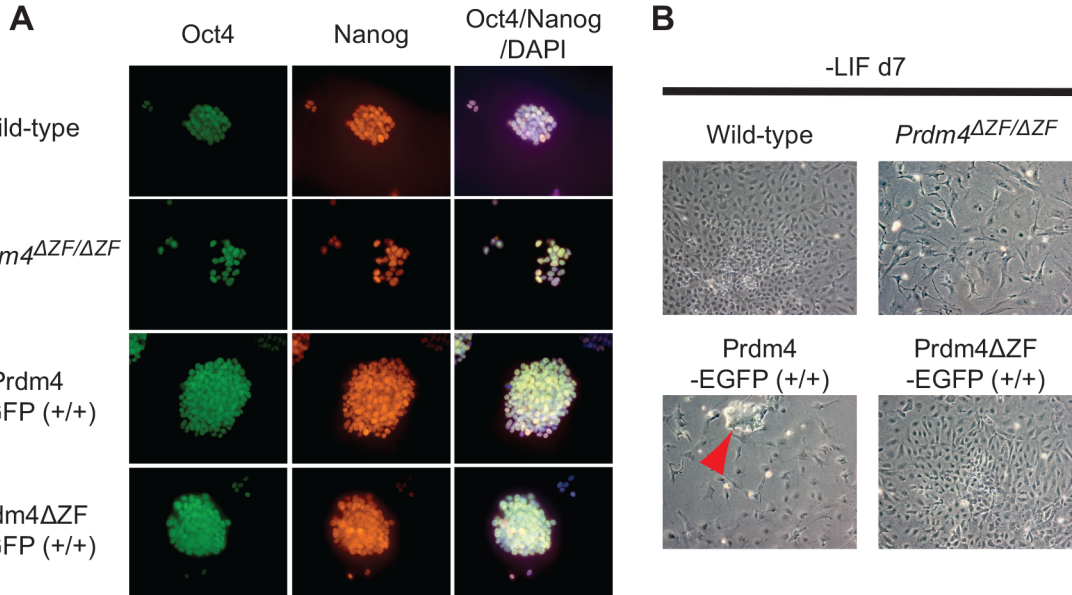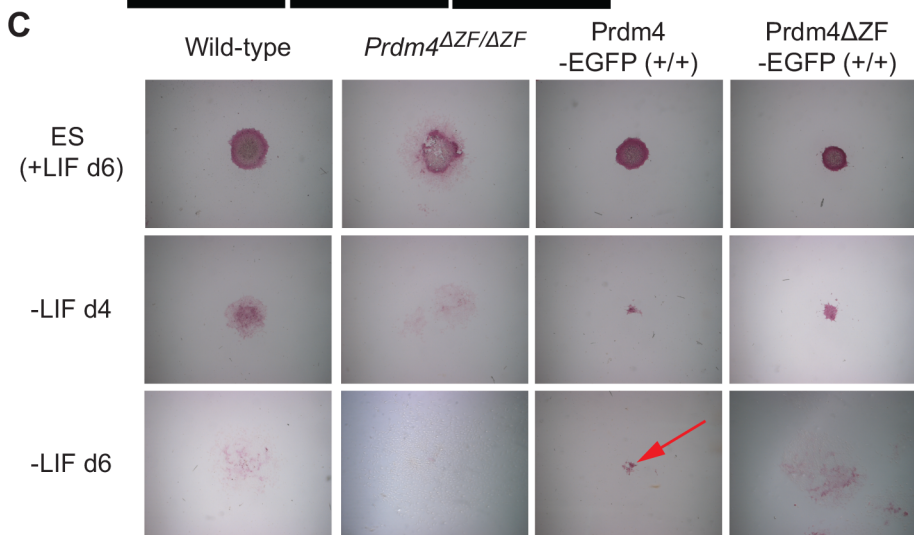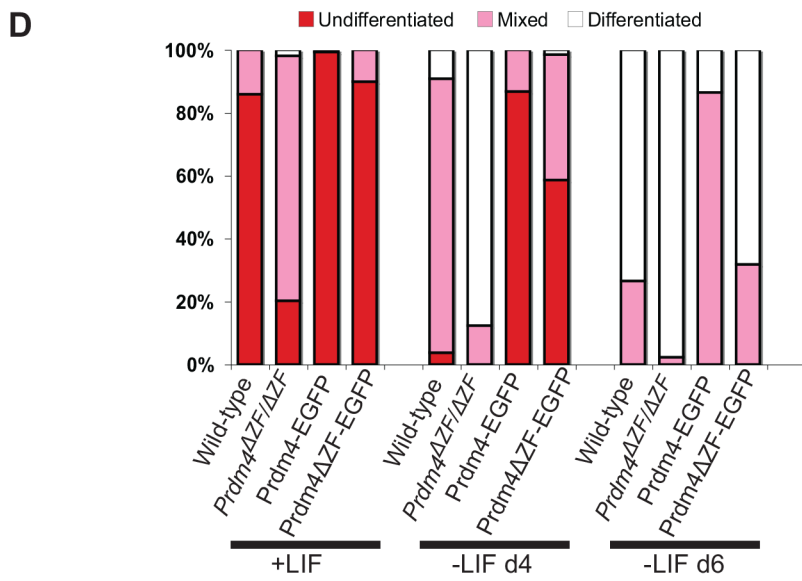

**FIG S2** Loss of Prdm4 increases ESC differentiation abilities, while over-expression enhances self-renewal. (A) Expression of pluripotency markers Oct4 & Nanog in Prdm4-null (*Prdm4* <sup>$\Delta$ ZF/ $\Delta$ ZF</sup>) and wild-type ESCs, and wild-type cells over-expressing either EGFP tagged full-length Prdm4 (Prdm4-EGFP +/+) or EGFP-tagged Prdm4 lacking the zinc finger domain (Prdm4 $\Delta$ ZF-EGFP +/+). (B) ESCs were cultured without LIF (leukaemia inhibitory factor) for 7 days. All populations were induced to differentiate, but a proportion of Prdm4-EGFP over-expressing cells continue to display ESC-like morphology (red arrowhead), indicating that they may be more resistant to differentiation. (C & D) ESCs of indicated genotypes were plated at clonal density and grown in LIF-containing medium for 6 days (+LIF d6) or in the absence of LIF for 4 (-LIF d4) to 6 days (-LIF d6) and the resulting colonies were stained for alkaline phosphatase activity. Examples of clonal morphology are shown in (C). Colonies were classified into three categories as follows: Undifferentiated colonies (red bars) exclusively contained alkaline phosphatase positive cells. Differentiated colonies (white bars) gave no alkaline phosphatase staining. Mixed (pink bars) contained both alkaline phosphatase positive and unstained cells. (D) Bar graph summary of alkaline phosphatase staining results. Prdm4-null ESCs produced fewer 100% alkaline phosphatase positive colonies and rapidly differentiate upon LIF withdrawal. In contrast alkaline phosphatase positive cells continued to be observed in Prdm4-EGFP over-expressing cell cultures even upon LIF withdrawal for 6 days.
